# Supplementary material
Source: PubMed Central journal article supplement (PMC8354300)
Supplement: NIHMS1717670-supplement-Supplementary_files.pdf [file NIHMS1717670-supplement-Supplementary_files.pdf]

# THE LANCET

## **Supplementary appendix**

This appendix formed part of the original submission and has been peer reviewed.  
We post it as supplied by the authors.

Supplement to: Scheltens P, De Strooper B, Kivipelto M, et al. Alzheimer's disease. *Lancet* 2021; published online March 2. [http://dx.doi.org/10.1016/S0140-6736\(20\)32205-4](http://dx.doi.org/10.1016/S0140-6736(20)32205-4).

## Appendix

Table 1. A/T/N biomarkers for AD.

|           | <b>Amyloid (A)</b>                                            | <b>Tau (T)</b>                                            | <b>Neurodegeneration (N)</b>           |
|-----------|---------------------------------------------------------------|-----------------------------------------------------------|----------------------------------------|
| Pathology | A $\beta$ species: monomers; oligomers; protofibrils; plaques | Tau species: monomers; oligomers; neurofibrillary tangles | Neuronal death; synaptic loss          |
| CSF       | A $\beta$ 1-42; A $\beta$ 1-40                                | P-tau (181, 217)                                          | Total tau; Mfb;; neurogranin           |
| Blood     | A $\beta$ 42/40                                               | P-tau (181, 217)                                          | Nfl                                    |
| Imaging   | Amyloid PET (fibrillar, insoluble, plaque A'B)                | Tau PET (neurofibrillary tangles)                         | MRI (atrophy);<br>FDG PET (metabolism) |

A $\beta$  - amyloid-beta protein; CSF - cerebrospinal fluid; FDG - fluorodeoxyglucose; MRI - magnetic resonance imaging; Nfl - neurofilament light chain; PET - positron emission tomography; p-tau - hyperphosphorylated tau protein

**Table 2. Completed large, long-term multidomain intervention RCT**

| Study, country                     | Intervention                                                                                                                                                                   | Duration                                     | N    | Recruitment strategy                                                                   | Inclusion criteria                                                                                                                            | Primary Outcome                                                                  | Primary outcome results                                                                                                                    | Secondary cognitive outcome results                                                                                              | Other results on cognitive outcomes                                                                                                                                                             |
|------------------------------------|--------------------------------------------------------------------------------------------------------------------------------------------------------------------------------|----------------------------------------------|------|----------------------------------------------------------------------------------------|-----------------------------------------------------------------------------------------------------------------------------------------------|----------------------------------------------------------------------------------|--------------------------------------------------------------------------------------------------------------------------------------------|----------------------------------------------------------------------------------------------------------------------------------|-------------------------------------------------------------------------------------------------------------------------------------------------------------------------------------------------|
| <b>FINGER</b><br>Finland           | Multidomain intervention including dietary counselling, exercise and cognitive training, and vascular risk factor monitoring<br><br>vs.<br><br>regular health advice (control) | 2-year intervention;<br><br>7-year follow-up | 1260 | Participants from previous population-based national surveys; individual randomization | Age: 60-77;<br><br>Elevated risk for dementia based on CAIDE score $\geq 6$ points; and cognitive function at or slightly below average level | Cognition measured with NTB (a composite measure of 14 standard cognitive tasks) | Intervention had beneficial effect on NTB: between-group (intervention vs. control) difference for NTB change was 0.022 (p=0.030) per year | Beneficial effect of intervention on executive functioning (p=0.039), and processing speed (p=0.029), but not on memory (p=0.36) | Beneficial effect of intervention on memory, when including more complex memory tasks (p=0.036).<br><br>Higher risk of decline in cognition in control group compared to the intervention group |
| <b>PreDIVA)</b><br>The Netherlands | Multidomain cardiovascular intervention (advice)<br><br>vs.                                                                                                                    | 6-year intervention                          | 3526 | General practices; cluster-randomization of 116 general practices                      | Age: 70-78 years                                                                                                                              | Incidence of dementia                                                            | No effect of intervention on dementia: HR 0.92 (p=0.54)                                                                                    | No effect of intervention on MMSE and VAT.                                                                                       | Lower risk of dementia in participants with untreated hypertension at baseline who were adherent to the intervention (p=0.02).                                                                  |

|                       |                                                                                                                                                                                                                                                         |                     |      |                                                                                             |                                                                                    |                                                                         |                                                                                                                                                                                                                                                 |                                                                                                                                                                                                                                   |                                                                                                                                                                                                                                                                                                                                                                                                   |
|-----------------------|---------------------------------------------------------------------------------------------------------------------------------------------------------------------------------------------------------------------------------------------------------|---------------------|------|---------------------------------------------------------------------------------------------|------------------------------------------------------------------------------------|-------------------------------------------------------------------------|-------------------------------------------------------------------------------------------------------------------------------------------------------------------------------------------------------------------------------------------------|-----------------------------------------------------------------------------------------------------------------------------------------------------------------------------------------------------------------------------------|---------------------------------------------------------------------------------------------------------------------------------------------------------------------------------------------------------------------------------------------------------------------------------------------------------------------------------------------------------------------------------------------------|
|                       | usual care (control)                                                                                                                                                                                                                                    |                     |      |                                                                                             |                                                                                    |                                                                         |                                                                                                                                                                                                                                                 | No effect of intervention on AD.<br><br>Lower risk of non-AD dementia in the intervention group (p=0.007)                                                                                                                         |                                                                                                                                                                                                                                                                                                                                                                                                   |
| <b>MAPT</b><br>France | Multidomain intervention including integrated cognitive training, physical activity and dietary advice, and preventive consultations plus omega 3 PUFAs<br><br>vs.<br><br>multidomain<br><br>vs.<br><br>omega 3 PUFAs<br><br>vs.<br><br>placebo capsule | 3-year intervention | 1680 | Diverse strategies including patient databases and advertisements; individual randomization | Age: 70+<br><br>Presence of memory complaint or IADL limitation or slow gait speed | Cognition measured with a composite z score combining 4 cognitive tests | No significant difference between any of the 3 intervention groups compared to placebo: between group difference was 0.093 (p=0.142) for multidomain + PUFA; 0.079 (p=0.179) for multidomain; and 0.011 (p=0.812) for PUFA compared to placebo. | Multidomain plus PUFA (p=0.036) had less decline in 10 MMSE orientation items compared to placebo group. Other group comparisons and other cognitive outcomes (FCSRT, DSST, Category naming test, COWAT, MMSE, TMT A, TMT B, CDR- | Less cognitive decline in those that received multidomain intervention (2 groups pooled) compared to those that did not (other 2 groups pooled) (p=0.015).<br><br>Beneficial effect of multidomain plus PUFA vs. placebo among those with CAIDE score >=6. Beneficial effect of multidomain plus PUFA (p<0.001) and multidomain (p=0.003) groups vs. placebo among those with amyloid positivity. |

|  |  |  |  |  |  |  |  |                       |  |
|--|--|--|--|--|--|--|--|-----------------------|--|
|  |  |  |  |  |  |  |  | SB) showed no effect. |  |
|--|--|--|--|--|--|--|--|-----------------------|--|

**Table 3. Principal disease-modifying therapies in the AD drug development pipeline (adapted from Cummings et al, 2020)**

| Target Class | Drug              | Type of Agent                                         | Phase  | Population                                   | Diagnostic Biomarker       |
|--------------|-------------------|-------------------------------------------------------|--------|----------------------------------------------|----------------------------|
| Amyloid      | ABvac40           | Active vaccine                                        | II     | Prodromal/mild dementia                      | None                       |
|              | Aducanumab        | Monoclonal antibody                                   | III    | Prodromal/mild dementia                      | Amyloid PET                |
|              | APH-1105          | Alpha-secretase modulator                             | II     | Mild-moderate dementia                       | None                       |
|              | Azeliragon        | RAGE inhibitor; anti-inflammatory; glucose modulation | II/III | Mild dementia                                | None                       |
|              | BAN-2401          | Monoclonal antibody                                   | III    | Prodromal/mild dementia                      | CSF or PET amyloid markers |
|              | Gantenerumab      | Monoclonal antibody                                   | III    | Prodromal/mild dementia and preclinical ADAD | CSF or PET amyloid markers |
|              | CAD106            | Active vaccine                                        | III    | Preclinical ADAD                             | ApoE-4 homozygotes         |
|              | Crenezumab        | Monoclonal antibody                                   | II     | ADAD                                         | PS1 mutation carriers      |
|              | Grapeseed extract | Reduces A $\beta$ oligomerization                     | II     | Mild-moderate dementia                       | None                       |
|              | Donanemab         | Monoclonal antibody against pyroglutamate A $\beta$   | II     | Prodromal/mild dementia                      | Amyloid PET/TAU Pet        |

|                                      |                            |                                                                                         |     |                                                           |                                  |
|--------------------------------------|----------------------------|-----------------------------------------------------------------------------------------|-----|-----------------------------------------------------------|----------------------------------|
|                                      | PQ912                      | Small molecule;<br>Glutaminyl cyclase<br>inhibitor to reduce<br>pyroglutamate A $\beta$ | II  | Mild cognitive<br>impairment/ mild<br>dementia            | CSF amyloid<br>markers           |
|                                      | Solanezumab                | Monoclonal antibody                                                                     | III | Preclinical AD                                            | Amyloid PET                      |
|                                      | Thiethylperazine<br>(TEP)  | Activates ABCC1<br>transporter to remove A $\beta$<br>from the brain                    | II  | Mild cognitive<br>impairment/ mild<br>dementia            | None                             |
| Tau                                  | ABBV-8E12                  | Monoclonal antibody                                                                     | II  | Prodromal/mild<br>dementia                                | Amyloid PET                      |
|                                      | BIIB080 (IONIS<br>MAPTRx)  | Antisense RNA                                                                           | II  | Prodromal/mild<br>dementia                                | CSF amyloid<br>markers           |
|                                      | BIIB092                    | Monoclonal antibody                                                                     | II  | Prodromal/mild<br>dementia                                | CSF or PET<br>amyloid<br>markers |
|                                      | LY3303560<br>(zagotenemab) | Monoclonal antibody                                                                     | II  | Prodromal/mild<br>dementia                                | None                             |
|                                      | RO7105705<br>(semorinemab) | Monoclonal antibody                                                                     | II  | Prodromal/mild<br>dementia and mild-<br>moderate dementia | CSF or PET<br>amyloid<br>markers |
|                                      | TRx0237                    | Tau aggregation inhibitor                                                               | III | Mild-moderate<br>dementia                                 | Amyloid PET                      |
| Proteostasis/<br>protein<br>opathies | Nilotinib                  | Tyrosine kinase inhibitor                                                               | II  | Mild-moderate<br>dementia                                 | CSF amyloid<br>markers           |

|                                         |              |                                                                                                           |     |                                            |                                    |
|-----------------------------------------|--------------|-----------------------------------------------------------------------------------------------------------|-----|--------------------------------------------|------------------------------------|
|                                         | Posiphen     | APP production inhibitor; reduces A $\beta$ , tau, alpha-synuclein                                        | II  | Prodromal/mild dementia                    | CSF amyloid markers                |
| Epigenetic regulators                   | GV1001       | Mimics extratelomeric function of hTERT                                                                   | II  | Mild to moderate dementia                  | None                               |
|                                         | Nicotinamide | Histone deacetylase inhibitor                                                                             | II  | Prodromal/mild dementia                    | CSF amyloid markers                |
|                                         | ORY-2001     | Regulates HDAC demethylase and MAOB                                                                       | II  | Mild-moderate dementia                     | CSF amyloid markers                |
| Synaptic plasticity and neuroprotection | ANAVEX-2-73  | Sigma-1 receptor agonist; M2 autoreceptor antagonist; ameliorates oxidative stress and protein misfolding | III | Mild cognitive impairment/mild dementia    | CSF or PET amyloid markers         |
|                                         | AGB101       | SVA2 modulator                                                                                            | III | Prodromal/mild dementia                    | Amyloid PET                        |
|                                         | AMX0035      | Mitochondrial and ER stress modulator                                                                     | II  | Prodromal/mild dementia                    | Amyloid PET, CSF, FDG PET, or vMRI |
|                                         | AR1001       | PDE5 inhibitor                                                                                            | II  | Mild-moderate dementia                     | None                               |
|                                         | BPN14770     | PDE4 inhibitor                                                                                            | II  | Mild cognitive impairment/mild AD dementia | None                               |
|                                         | Cilostazol   | PDE3 inhibitor                                                                                            | II  | Prodromal/mild dementia                    | None                               |



|  |                       |                                                                                  |     |                           |                            |
|--|-----------------------|----------------------------------------------------------------------------------|-----|---------------------------|----------------------------|
|  | CT1812                | Sigma-2 receptor antagonist                                                      | II  | Mild-moderate dementia    | CSF or PET amyloid markers |
|  | Deferiprone           | Iron chelating agent                                                             | II  | Prodromal/mild dementia   | Amyloid PET                |
|  | GV1001                | Telomerase reverse transcriptase vaccine reduces A $\beta$ related neurotoxicity | II  | Moderate-severe dementia  | None                       |
|  | GRF6019               | Human plasma protein fractions                                                   | II  | Moderate-severe dementia  | None                       |
|  | Icosapent ethyl (IPE) | Improves synaptic function; neuroprotective; reduces inflammation                | III | Cognitively normal        | None                       |
|  | Levetiracetam         | SV2A modulator                                                                   | II  | Mild-moderate dementia    | None                       |
|  | LM11A-31-BHS          | P75 neurotrophin receptor ligand                                                 | II  | Mild-moderate dementia    | CSF amyloid markers        |
|  | Neflamapimod (VX-745) | Enhances endolysosomal function to reduce synaptic dysfunction                   | II  | Prodromal AD              | CSF or PET amyloid markers |
|  | PTI-125               | FLNA inhibitor                                                                   | II  | Mild-moderate dementia    | None                       |
|  | NA-831 (traneurocin)  | Endogenous small molecule that exhibits neuroprotection, neurogenesis, and       | II  | Mild cognitive impairment | None                       |

|                            |                                  |                                                                     |     |                           |                     |
|----------------------------|----------------------------------|---------------------------------------------------------------------|-----|---------------------------|---------------------|
|                            |                                  | cognitive protective properties                                     |     |                           |                     |
|                            | Riluzole                         | Glutamate receptor antagonist                                       | II  | Prodromal/mild dementia   | None                |
|                            | RPh201                           | Neuroprotective                                                     | II  | Mild-moderate dementia    | None                |
|                            | Troriluzole (BHV4157)            | Reduces synaptic levels of glutamate; improves synaptic functioning | III | Probable AD dementia      | None                |
| Inflammation and infection | ALZT-OP1 (cromolyn + ibuprophen) | Mast cell stabilizer (cromolyn), anti-inflammatory (ibuprofen)      | III | Prodromal AD              | CSF amyloid markers |
|                            | COR388                           | Bacterial protease inhibitor                                        | III | Mild-moderate dementia    | None                |
|                            | Curcumin + aerobic yoga          | Decrease inflammation and reduce oxidation-related neuronal injury  | II  | Mild cognitive impairment | None                |
|                            | Daratumumab                      | Monoclonal antibody targeting CD38                                  | II  | Mild-moderate dementia    | Amyloid PET         |
|                            | Dasatinib + quercetin            | Tyrosine kinase inhibitor + flavinoid                               | II  | Mild-moderate dementia    | None                |
|                            | Elderberry juice                 | Antioxidant, anti-inflammatory, mitochondrial effects               | II  | Mild cognitive impairment | None                |
|                            | GB301                            | Regulates T cells and reduced inflammation                          | II  | Mild-moderate AD dementia | Amyloid PET         |

|                              |                  |                                                                  |     |                                            |             |
|------------------------------|------------------|------------------------------------------------------------------|-----|--------------------------------------------|-------------|
|                              | Lenalidomide     | Immunomodulator                                                  | II  | Mild cognitive impairment                  | None        |
|                              | L-serine         | Amino acid                                                       | II  | Prodromal/mild dementia                    | None        |
|                              | Masitinib        | Modulation of mast cell-related inflammatory processes           | III | Mild-moderate dementia                     | None        |
|                              | Montelukast      | Leukotriene receptor antagonist                                  | II  | Mild cognitive impairment/ mild dementia   | None        |
|                              | Rifaximin        | Anti-inflammatory; reduces cytokines derived from gut bacteria   | II  | Mild-moderate dementia                     | None        |
|                              | Sargamostim      | Immune system stimulation                                        | II  | Mild cognitive impairment/ mild dementia   | Amyloid PET |
|                              | Valacyclovir     | Antiviral agent to reduce impact of herpes viral influence in AD | II  | Prodromal/mild dementia                    | None        |
| Metabolism and bioenergetics | Banfotiamine     | Improve glucose utilization and neuronal metabolism              | II  | Mild cognitive impairment/mild AD dementia | Amyloid PET |
|                              | Dapagliflozin    | SGLT2 inhibitor                                                  | II  | Mild-moderate dementia                     | None        |
|                              | Elderberry juice | Antioxidant; anti-inflammatory                                   | II  | Mild cognitive impairment                  | None        |

|          |                                                          |                                                                         |        |                                               |                                  |
|----------|----------------------------------------------------------|-------------------------------------------------------------------------|--------|-----------------------------------------------|----------------------------------|
|          | Ginkgo biloba                                            | Mitochondrial modulator;<br>cerebral blood flow<br>enhancer             | II/III | Dementia                                      | None                             |
|          | Insulin glulisine                                        | Insulin sensitivity<br>enhancer                                         | II     | Prodromal/mild<br>dementia                    | None                             |
|          | Liraglutide                                              | Glucagon-like peptide I<br>receptor agonist                             | II     | Prodromal/mild<br>dementia                    | None                             |
|          | Metabolic cofactors                                      | Enhances mitochondrial<br>activity                                      | II     | Mild-moderate<br>dementia                     | None                             |
|          | Metformin                                                | Insulin sensitizer to<br>improve neuronal glucose<br>utilization        | III    | Mild cognitive<br>impairment + obesity        | None                             |
|          | S-equol (AUS-131)                                        | Nonhormonal estrogen<br>receptor B agonist;<br>mitochondrial protectant | II     | Mild-moderate<br>dementia                     | None                             |
|          | Tricaprin                                                | Induces ketosis as<br>alternative neuronal<br>energy source             | III    | Mild-moderate<br>dementia                     | FDG PET                          |
|          | T3D-959                                                  | PPAR agonist                                                            |        |                                               |                                  |
| Vascular | Losartan +<br>amlodipine +<br>atorvastatin +<br>exercise | Vascular risk reduction                                                 | III    | Cognitively normal at<br>elevated risk for AD | None                             |
|          | Candesartan                                              | Angiotensin receptor<br>blocker                                         | II     | Prodromal/mild<br>dementia                    | CSF or PET<br>amyloid<br>markers |

|                |                              |                                                         |    |                                                                                    |             |
|----------------|------------------------------|---------------------------------------------------------|----|------------------------------------------------------------------------------------|-------------|
|                | Omega-3 PUFA                 | Long chain fatty acid with anti-inflammatory properties | II | Cognitively normal or mild cognitive impairment with white matter hyperintensities | None        |
|                | Telmisartan plus perindopril | Angiotensin converting enzyme inhibitor                 | II | Mild-moderate dementia                                                             | None        |
| Growth factors | Lupron                       | Growth factor; neuroprotection                          | II | Mild-moderate AD dementia                                                          | Amyloid PET |

A $\beta$  - amyloid beta-protein; ADAD – autosomal dominant Alzheimer’s disease; ApoE-4 – apolipoprotein E 4; APP – amyloid precursor protein; CSF – cerebrospinal fluid findings indicative of AD; ER – endoplasmic reticulum; FDG PET – fluorodeoxyglucose positron emission tomography; FLNA – filamin A; HDAC – histone deacetylase; hTERT – human telomerase reverse transcriptase; MAOB – monoamine oxidase B; MAPK – microtubule associate protein kinase; PET – positron emission tomography; PDE - phosphodiesterase; PPAR – peroxisome proliferator-activated receptor; PS1 – presenilin 1; RNA – ribonucleic acid; SGLT – sodium glucose transporter; SVA2 – synaptic vesicle glycoprotein 2A

| Our Reference       | First filing date | Filing date priority Year | Patent Management                                                                                                                                                               | Description                                                                                                         | Inventor(s)                                                          | Status                 | Number                                            |
|---------------------|-------------------|---------------------------|---------------------------------------------------------------------------------------------------------------------------------------------------------------------------------|---------------------------------------------------------------------------------------------------------------------|----------------------------------------------------------------------|------------------------|---------------------------------------------------|
| BaDS/GSSC/577       | 12/01/2017        | 2017                      | K.U.Leuven (Applicant)<br>VIB (Applicant)<br>VIB (Prosecution)                                                                                                                  | Gamma-secretase stabilizing compound screening assay                                                                | Bart De Strooper<br>Lucía Chávez Gutiérrez<br>Maria Szaruga          | Pending non-licensed   | WO 2018/130555<br>US Patent App. 16/477,391, 2019 |
| JoDW/APPbinding/557 | 20/07/2016        | 2016                      | K.U.Leuven (Applicant)<br>VIB (Applicant)<br>VIB (Prosecution)                                                                                                                  | Therapeutic agents for neurological and psychiatric disorders                                                       | Bart De Strooper<br>Heather Rice<br>Joris de Wit                     | Pending non-licensed   | WO 2018/015296                                    |
| BaDS/MIR27/442      | 25/01/2013        | 2013                      | K.U.Leuven (Applicant)<br>VIB (Applicant)<br>VIB (Prosecution)                                                                                                                  | MicroRNA markers for the prognosis and diagnosis of Alzheimer's disease                                             | Bart De Strooper<br>Carlo Sala Frigerio                              | Abandoned              | US 61/756,611                                     |
| BaDS/PINKSUB/435    | 07/11/2012        | 2012                      | K.U.Leuven (Applicant)<br>VIB (Applicant)<br>VIB (Prosecution)                                                                                                                  | Restoring phosphorylation of a novel PINK1 substrate to treat Parkinson's disease                                   | Bart De Strooper<br>Patrik Verstreken<br>Vanessa Morais Epifânio     | Pending non-licensed   | WO 2014/072412                                    |
| BaDS/TSPAN6/405     | 30/01/2012        | 2012                      | K.U.Leuven (Applicant)<br>VIB (Applicant)<br>VIB (Prosecution)                                                                                                                  | Means and method for diagnosis and treatment of Alzheimer's disease                                                 | Bart De Strooper<br>Francesc Guix                                    | Abandoned              | WO 2013/113696                                    |
| WiAn/ARF6/330       | 04/12/2009        | 2009                      | K.U.Leuven (Applicant)<br>VIB (Applicant)<br>VIB (Prosecution)                                                                                                                  | ARF6 as a new target for treating Alzheimer's disease                                                               | Bart De Strooper<br>Katrijn Coen<br>Ragna Sannerud<br>Willem Annaert | Abandoned              | WO 2011/067420                                    |
| BaDS/ABBACE/312     | 15/06/2009        | 2009                      | ADx NeuroSciences (Licensee)<br>Denali Therapeutics (Licensee)<br>Denali Therapeutics (Prosecution)<br>K.U.Leuven (Applicant)<br>VIB (Applicant)<br>VIB (Prosecution)           | BACE1 Inhibitory Antibodies                                                                                         | Bart De Strooper<br>Lujia Zhou<br>Willem Annaert                     | Non Exclusive Licensed | WO2010/146058                                     |
| BaDS/ARR/311        | 08/06/2009        | 2009                      | K.U.Leuven (Applicant)<br>VIB (Applicant)<br>VIB (Prosecution)                                                                                                                  | Screening for compounds that modulate GPR3-mediated $\beta$ -arrestin signaling and amyloid beta peptide generation | Amantha Thathiah<br>Bart De Strooper                                 | Abandoned              | WO 2010/142603                                    |
| BDS/NANOBACE/281    | 03/04/2008        | 2008                      | Denali Therapeutics (Licensee)<br>Denali Therapeutics (Prosecution)<br>K.U.Leuven (Applicant)<br>VIB (Applicant)<br>VIB (Prosecution)<br>Vrije Universiteit Brussel (Applicant) | Single domain antibodies capable of modulating BACE activity                                                        | Bart De Strooper<br>Els Marjaux<br>Lujia Zhou<br>Serge Muyldermans   | Non Exclusive Licensed | WO 2009/121948                                    |
| BDS/TETRA/269       | 04/10/2007        | 2007                      | K.U.Leuven (Applicant)<br>VIB (Applicant)<br>VIB (Prosecution)                                                                                                                  | Extracellular targets for Alzheimer's disease                                                                       | Bart De Strooper<br>Tomoko Wakabayashi                               | Abandoned              | WO 2009/043922                                    |

|                |            |      |                                                                                                          |                                                                                                                                                         |                                                                                          |           |                |
|----------------|------------|------|----------------------------------------------------------------------------------------------------------|---------------------------------------------------------------------------------------------------------------------------------------------------------|------------------------------------------------------------------------------------------|-----------|----------------|
| SHE/MIR29/261  | 19/04/2007 | 2007 | K.U.Leuven (Applicant)<br>VIB (Applicant)<br>VIB (Prosecution)                                           | Oligonucleotide compositions for the treatment of Alzheimer's disease                                                                                   | Bart De Strooper<br>Sébastien Hébert                                                     | Abandoned | WO 2008/129023 |
| JSC/OLI/248    | 08/09/2006 | 2006 | K.U.Leuven (Applicant)<br>VIB (Applicant)<br>VIB (Prosecution)<br>Vrije Universiteit Brussel (Applicant) | Means and methods for the production of amyloid oligomers                                                                                               | Bart De Strooper<br>Frederic Rousseau<br>Ivo da Rocha Martins<br>Joost Schymkowitz       | Abandoned | WO 2008/028939 |
| BDS/PARL/213   | 12/08/2005 | 2005 | K.U.Leuven (Applicant)<br>VIB (Applicant)<br>VIB (Prosecution)                                           | A mitochondrial rhomboid protease as a target for lymphoma                                                                                              | Bart De Strooper<br>L. Scorrano<br>Sara Cipolat<br>Tomasz Rudka                          | Abandoned | WO 2007/020244 |
| BDS/APH/198    | 13/12/2004 | 2004 | K.U.Leuven (Applicant)<br>VIB (Applicant)<br>VIB (Prosecution)                                           | Transgenic animal models for neurodevelopmental disorders                                                                                               | Bart De Strooper<br>Dieter Hartmann<br>Lutgarde Serneels<br>Tim Dejaegere                | Abandoned | WO 2006/064007 |
| WAN/APPpep/128 | 17/09/2002 | 2002 | K.U.Leuven (Applicant)<br>Pepscan Therapeutics (Applicant)<br>VIB (Applicant)<br>VIB (Prosecution)       | Peptides inhibiting specific cleaving activities of presenilins                                                                                         | Bart De Strooper<br>H Langedijk<br>Willem Annaert                                        | Abandoned | WO 2004/026331 |
| BDS/BACE/089   | 12/06/2001 | 2001 | VIB (Applicant)<br>VIB (Prosecution)                                                                     | BACE interacting proteins                                                                                                                               | Bart De Strooper<br>Diana Dominguez<br>Els Marjaux<br>Willem Annaert                     | Abandoned | WO 02/101232   |
| BDS/PST/080    | 16/03/2001 | 2001 | VIB (Applicant)<br>VIB (Prosecution)                                                                     | Binding domains between presenilins and their substrates as targets for drug screening                                                                  | Bart De Strooper<br>Willem Annaert                                                       | Abandoned | WO 02/074804   |
| BDS/PSKO/052   | 25/02/2000 | 2000 | VIB (Applicant)<br>VIB (Prosecution)                                                                     | Presenilin deficient multipotent cell lines and screening methods for g-secretase activities and modulators of g-secretase activities using these lines | An Herreman<br>Bart De Strooper<br>Luc Schoonjans<br>Lutgarde Serneels<br>Willem Annaert | Abandoned | WO 01/62897    |
